# Supplementary material for: Activation of CO2 and CH4 on MgO surfaces: mechanistic insights from first-principles theory
Source: Royal Society of Chemistry journal article supplement (doi:10.1039/d1cp04152e), 2021-12-21
Supplement: d1cp04152e1.pdf [file d1cp04152e1.pdf]

Supporting Information for

## **Activation of CO<sub>2</sub> and CH<sub>4</sub> on MgO Surfaces: Mechanistic Insights from First-Principles Theory**

Meghna A. Manae,<sup>1</sup> Lakshay Dheer,<sup>1</sup> Sandhya Rai,<sup>2</sup> Sharan Shetty<sup>2</sup> and  
Umesh V. Waghmare<sup>1,\*</sup>

<sup>1</sup>Theoretical Sciences Unit, Jawaharlal Nehru Centre for Advanced Scientific  
Research, Bengaluru 560064, India

<sup>2</sup>Shell India Markets Pvt. Ltd., Mahadeva Kodigehalli, Bengaluru, Karnataka 562149,  
India

\*waghmare@jncasr.ac.in

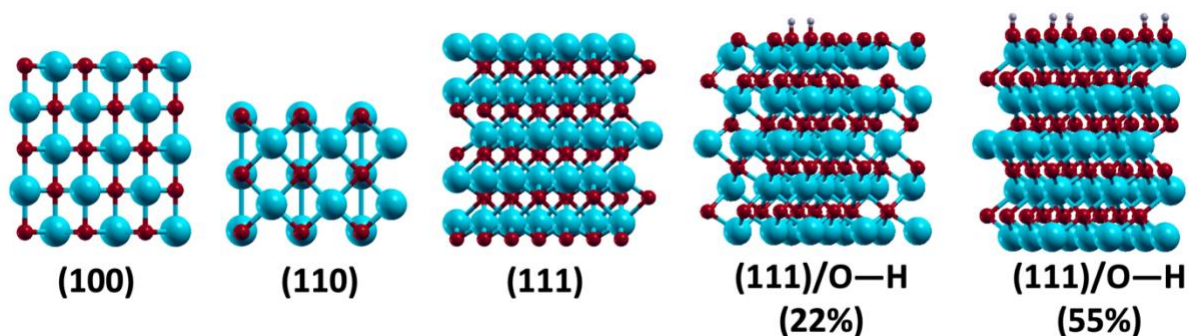

**Figure S1.** Optimized structures of various surfaces of MgO investigated in this work. Blue, red and gray atoms indicate Mg, O and H, respectively.

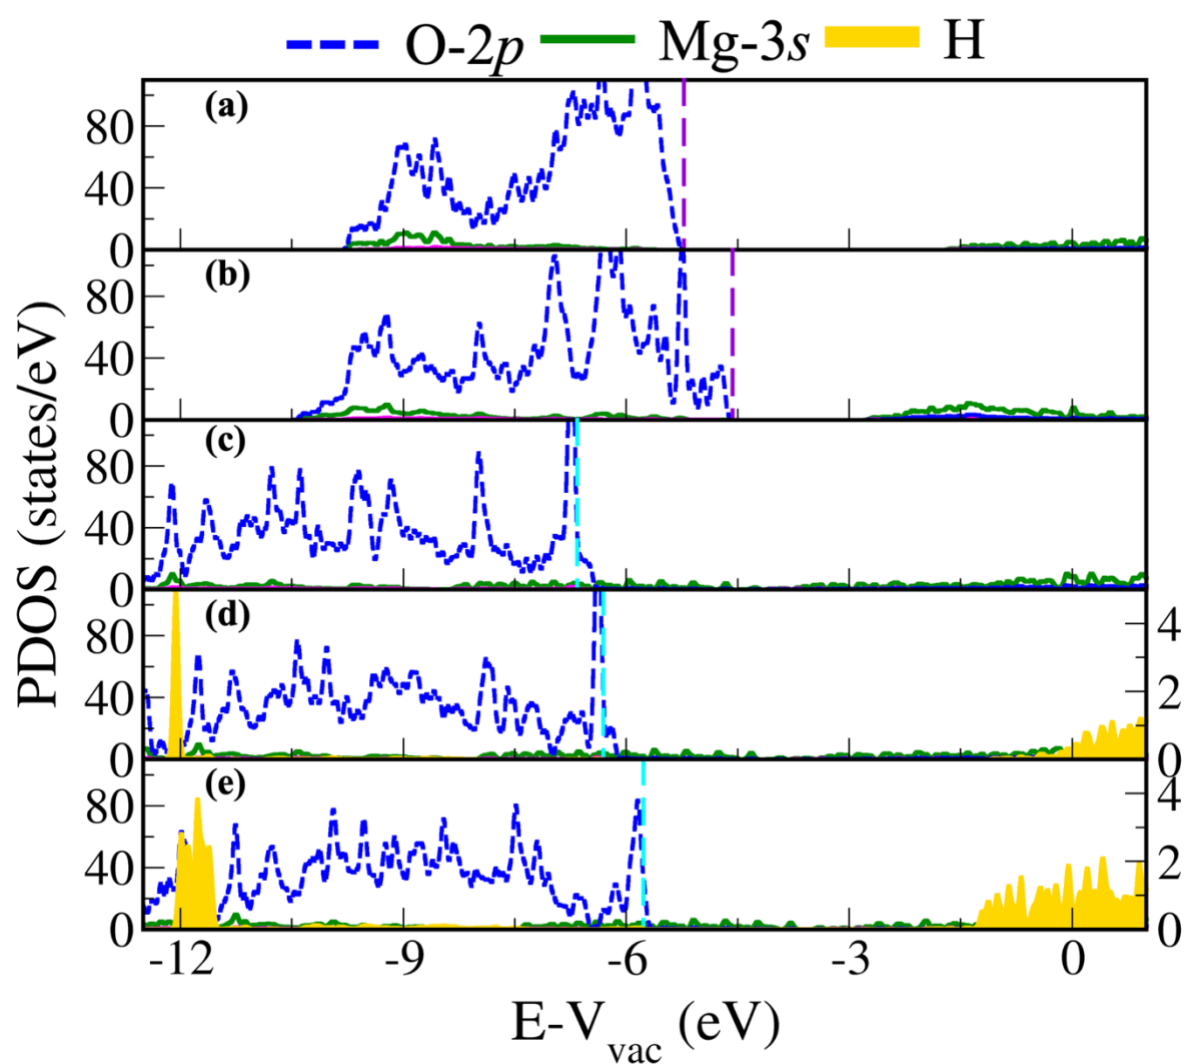

**Figure S2.** Projected density of states (PDOS) of the (a) (100), (b) (110), (c) (111), (d) (111)/O—H (22% hydroxylation), and (e) (111)/O—H (55% hydroxylation) surfaces of MgO. Alternate y-axis represents the DOS of H atoms. The energies are with respect to vacuum potential. Dashed purple and blue lines represent the VBM and Fermi level, respectively.

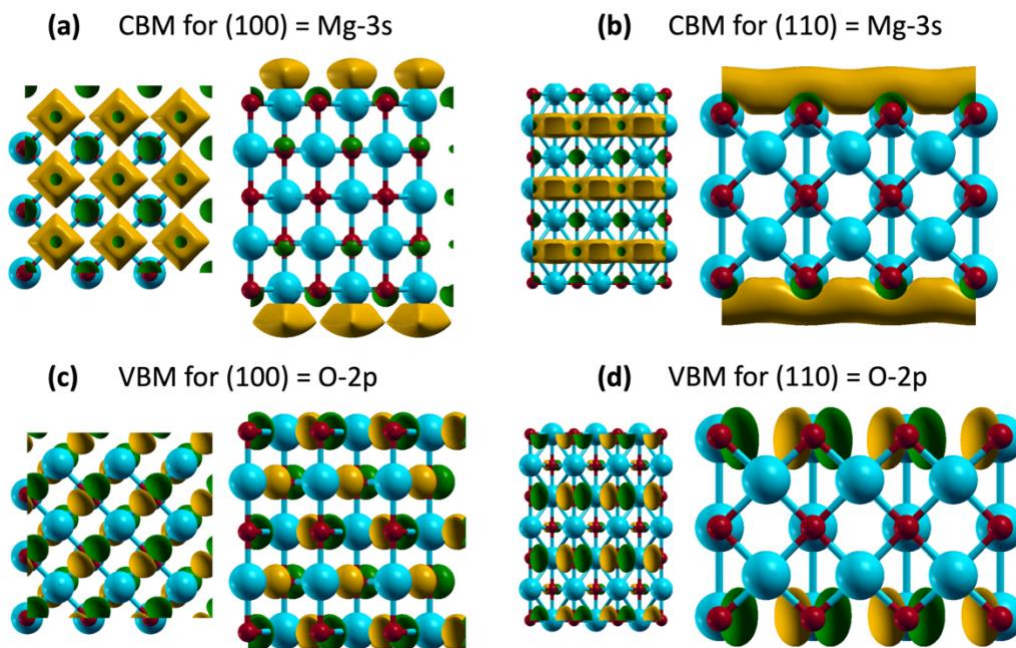

**Figure S3.** Isosurfaces for the conduction band maximum (CBM) of the (a) (100) surface, (b) (110) surface, and valence band minimum (VBM) for the (c) (100) surface and (d) (110) surface. Green and yellow in the isosurfaces correspond to positive and negative sides, respectively. For each subfigure, the isosurface on the left provides the  $xy$  view and the isosurface on the right provides the  $xz$  view (note that the vacuum is along the  $z$ -axis).

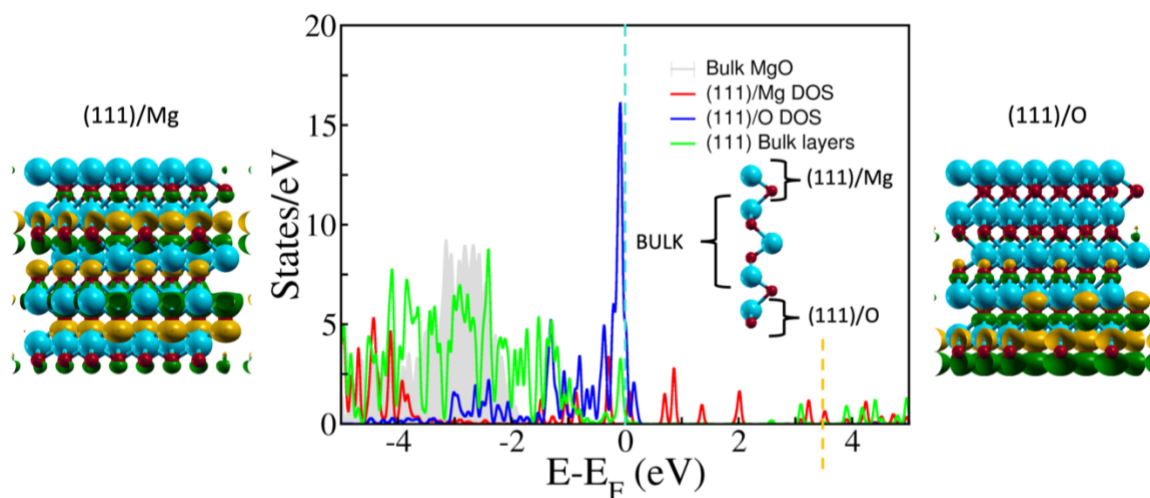

**Figure S4.** Locally resolved density of states (LDOS) of the (111) surface of MgO. The inset figure shows the planes whose states are represented by the red (O-terminated), blue (Mg-terminated) and green (bulk) curves. The isosurfaces of the Mg-terminated, (111)/Mg, and O-terminated, (111)/O planes of the surface are shown alongside. Green and yellow in the isosurfaces correspond to positive and negative sides, respectively. The shaded gray region are the states of bulk MgO and the vertical orange dashed line indicates the energy where the CBM of bulk MgO begins. The energies are plotted with respect to the Fermi energy and the dashed blue line represents the Fermi level.

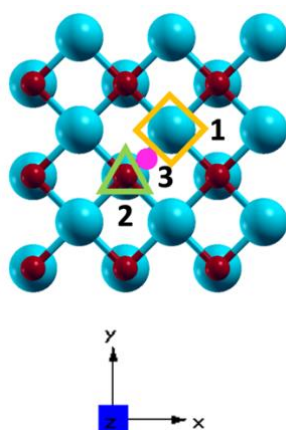

**Figure S5.** Sites on MgO surface which are considered for adsorption studies. Mg and O atoms are denoted by blue and red, respectively. For representative purposes, the (100) surface of MgO is shown here. Site 1, above Mg, represented as an orange rhombus, Site 2, above O, represented as a green triangle, and Site 3, above the bond connecting Mg and O, shown as a filled magenta circle.

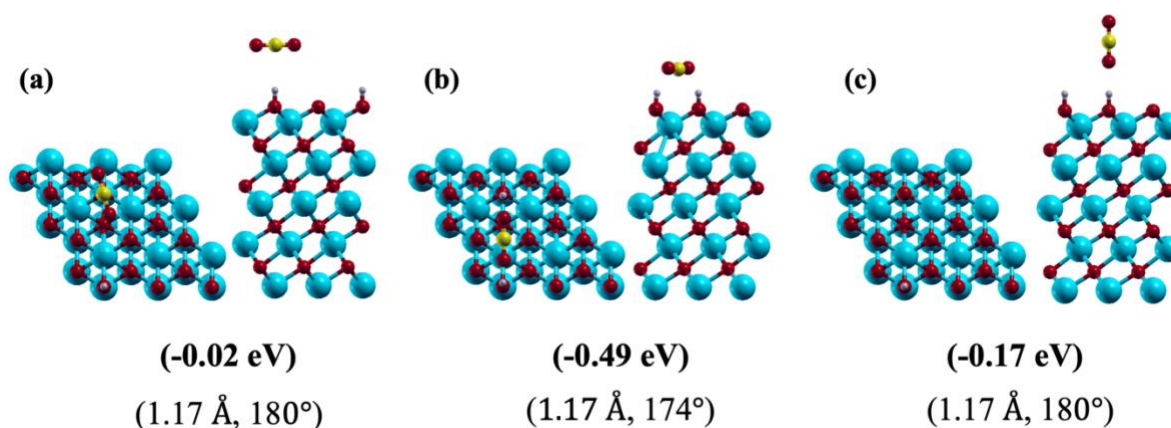

**Figure S6.** Optimized structures of CO<sub>2</sub> adsorbed on 22% (111)/O—H surface of MgO. See Table S4 for the initial geometries for these optimized structures. The bold numbers indicate adsorption energies, and those below indicate the bond lengths and angle in CO<sub>2</sub> following adsorption.

#### Reaction equations for the cases with high adsorption energies

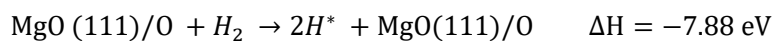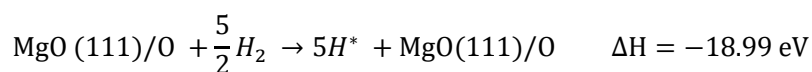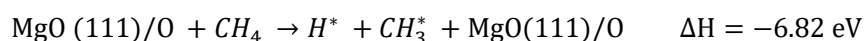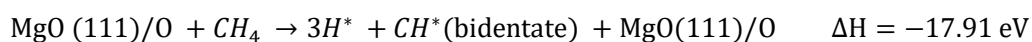

Negative enthalpies indicate energy released. \* indicates an entity adsorbed on surface. Reference energies of adsorbates are  $E_{\text{H}_2}$  or  $E_{\text{CH}_4}$  which account for energy of cleavage of bonds in the source molecules.

**Table S1.** CO<sub>2</sub> adsorption energies, and CO<sub>2</sub> adsorption energies without dispersion correction for the various pristine surfaces studied in this work. All values are given in eV. Highlighted structures correspond to those, whose electronic structure is shown in Figure 2 of the main paper.

| Surface  | Initial adsorption site | $\Delta E_{ads}$ | $\Delta E_{ads}^{\dagger}$ |
|----------|-------------------------|------------------|----------------------------|
| (100)    | Site 1                  | -0.119           | 0.037                      |
|          | Site 2                  | -0.599           | -0.318                     |
|          | Site 3                  | -1.004           | -0.739                     |
| (110)    | Site 1                  | -0.025           | 0.023                      |
|          | Site 2                  | -3.264           | -2.973                     |
|          | Site 3                  | -2.393           | -2.133                     |
| (111)/Mg | Site 1                  | -0.123           | -0.023                     |
|          | Site 2                  | -2.137           | -1.854                     |
|          | Site 3                  | -0.129           | -0.025                     |
| (111)/O  | Site 1                  | -0.221           | 0.000                      |
|          | Site 2                  | -0.188           | -0.020                     |
|          | Site 3                  | -0.198           | -0.002                     |

**Table S2.** Calculated Lowdin charges on C and O atoms of CO<sub>2</sub> in free form and in MgO-CO<sub>2</sub> adsorbed complexes (first row of the table gives Lowdin charges for an isolated CO<sub>2</sub> molecule). The highlighted charges correspond to adsorbed complexes in which CO<sub>2</sub> molecule is activated and chemisorbed on MgO.

| Adsorbed complex                  | Atom | Number of valence electrons |      | Total number of valence electrons | Lowdin charge on CO <sub>2</sub> molecule |
|-----------------------------------|------|-----------------------------|------|-----------------------------------|-------------------------------------------|
|                                   |      | s                           | p    |                                   |                                           |
| Isolated CO <sub>2</sub> molecule | C    | 0.74                        | 3.18 | 16.24                             | -0.24                                     |
|                                   | O    | 1.66                        | 4.50 |                                   |                                           |
|                                   | O    | 1.66                        | 4.50 |                                   |                                           |
| (100) at Site 1                   | C    | 0.74                        | 2.49 | 15.76                             | 0.24                                      |
|                                   | O    | 1.66                        | 4.61 |                                   |                                           |
|                                   | O    | 1.66                        | 4.61 |                                   |                                           |
| (100) at Site 2                   | C    | 0.82                        | 2.57 | 16.42                             | -0.42                                     |
|                                   | O    | 1.69                        | 4.83 |                                   |                                           |
|                                   | O    | 1.69                        | 4.83 |                                   |                                           |

|                    |   |      |      |       |       |
|--------------------|---|------|------|-------|-------|
| (100) at Site 3    | C | 0.82 | 2.57 | 16.45 | -0.45 |
|                    | O | 1.69 | 4.85 |       |       |
|                    | O | 1.69 | 4.85 |       |       |
| (110) at Site 1    | C | 0.74 | 2.47 | 15.75 | 0.25  |
|                    | O | 1.66 | 4.61 |       |       |
|                    | O | 1.66 | 4.61 |       |       |
| (110) at Site 2    | C | 0.80 | 2.49 | 16.48 | -0.48 |
|                    | O | 1.69 | 4.91 |       |       |
|                    | O | 1.69 | 4.91 |       |       |
| (110) at Site 3    | C | 0.81 | 2.52 | 16.62 | -0.62 |
|                    | O | 1.69 | 4.96 |       |       |
|                    | O | 1.69 | 4.96 |       |       |
| (111)/Mg at Site 1 | C | 0.75 | 2.48 | 15.77 | 0.23  |
|                    | O | 1.66 | 4.61 |       |       |
|                    | O | 1.66 | 4.61 |       |       |
| (111)/Mg at Site 2 | C | 1.27 | 2.68 | 17.22 | -1.22 |
|                    | O | 1.71 | 4.92 |       |       |
|                    | O | 1.71 | 4.92 |       |       |
| (111)/Mg at Site 3 | C | 0.75 | 2.48 | 15.77 | 0.23  |
|                    | O | 1.66 | 4.61 |       |       |
|                    | O | 1.66 | 4.61 |       |       |
| (111)/O at Site 1  | C | 0.74 | 2.46 | 15.61 | 0.39  |
|                    | O | 1.66 | 4.54 |       |       |
|                    | O | 1.66 | 4.54 |       |       |
| (111)/O at Site 2  | C | 0.74 | 2.22 | 15.49 | 0.51  |
|                    | O | 1.66 | 4.62 |       |       |
|                    | O | 1.66 | 4.59 |       |       |
| (111)/O at Site 3  | C | 0.74 | 2.34 | 15.10 | 0.90  |
|                    | O | 1.67 | 4.36 |       |       |
|                    | O | 1.66 | 4.34 |       |       |

**Table S3.** CH<sub>4</sub> adsorption energies, and CH<sub>4</sub> adsorption energies without dispersion correction for the various pristine surfaces studied in this work. All values are given in eV. Highlighted structures correspond to those, whose electronic structure is shown in Figure 5 of the main paper.

| Surface  | Initial adsorption site | $\Delta E_{ads}$ | $\Delta E_{ads}^{\dagger}$ |
|----------|-------------------------|------------------|----------------------------|
| (100)    | Site 1                  | -0.302           | -0.064                     |
|          | Site 2                  | -0.123           | 0.022                      |
| (110)    | Site 1                  | -0.415           | -0.160                     |
|          | Site 2                  | -0.142           | 0.005                      |
| (111)/Mg | Site 1                  | -0.114           | -0.008                     |
|          | Site 2                  | -0.097           | -0.019                     |
| (111)/O  | Site 1                  | -17.910          | -17.551                    |
|          | Site 2                  | -6.816           | -6.756                     |

**Table S4.** Energies (in eV) correlated with number of interactions of O atoms on (111)/O surface of MgO.

| Surface                                                       | Stabilization energy/ Adsorption energy (eV) | Number of interactions of O atoms | Type of interactions of surface O atoms | Energy scaled by number of interactions of O atoms (eV) |
|---------------------------------------------------------------|----------------------------------------------|-----------------------------------|-----------------------------------------|---------------------------------------------------------|
| 22% (111)/O—H                                                 | -7.88                                        | 2                                 | 2 O—H bonds                             | -3.94                                                   |
| 55% (111)/O—H                                                 | -18.99                                       | 5                                 | 5 O—H bonds                             | -3.80                                                   |
| CH <sub>4</sub> adsorbed on (111)/O (cleavage of 1 C—H bond)  | -6.82                                        | 2                                 | 1 O—H bond<br>1 O—CH <sub>3</sub> bond  | -3.41                                                   |
| CH <sub>4</sub> adsorbed on (111)/O (cleavage of 3 C—H bonds) | -17.91                                       | 5                                 | 3 O—H bonds<br>2 O—CH bonds             | -3.58                                                   |

**Table S5.** Adsorption energies, and adsorption energies without dispersion correction of CO<sub>2</sub> and CH<sub>4</sub> for the hydroxylated surfaces studied in this work. All values are given in eV. Highlighted structures correspond to those, whose electronic structure is shown in Figure 7 of the main paper.

| Adsorbate       | Surface       | Initial adsorption site                | $\Delta E_{ads}$ | $\Delta E_{ads}^{\dagger}$ |
|-----------------|---------------|----------------------------------------|------------------|----------------------------|
| CO <sub>2</sub> | 22% (111)/O—H | Site 2                                 | -3.398           | -3.096                     |
|                 |               | (a) C of CO <sub>2</sub> above H       | -0.016           | 0.063                      |
|                 |               | (b) O of CO <sub>2</sub> above H       | -0.491           | -0.279                     |
|                 |               | (c) CO <sub>2</sub> vertically above H | -0.166           | -0.115                     |
|                 | 55% (111)/O—H | Site 2                                 | -3.218           | -2.887                     |
| CH <sub>4</sub> | 22% (111)/O—H | Site 2                                 | -6.501           | -6.068                     |
|                 | 55% (111)/O—H | Site 2                                 | -0.138           | 0.008                      |

### Cartesian coordinates for some relevant geometries

All values are given in Angstroms, and '0 0 0' indicate frozen coordinates.

#### Optimized structure – 22% (111)/O—H surface

CELL\_PARAMETERS {alat=9.103}

```
1.000000000000d0 0.000000000000d0 0.000000000000d0
-0.500001664841d0 0.866026923807d0 0.000000000000d0
0.000000000000d0 0.000000000000d0 2.8857243334382d0
```

```
O 0.900587347 -0.001077797 11.972466080
H 0.900976710 -0.000392591 12.942188474
Mg 0.900761386 1.734790189 11.041745163
O -0.585690942 0.857099438 9.666411599
Mg 0.900633849 -0.001202700 8.614841792
O 0.900679820 1.733005703 7.274434490
Mg -0.602487760 0.866576306 6.234920337
O 0.900592767 -0.001101068 4.879917992
Mg 0.900637401 1.733153702 3.839706215
O -0.601224548 0.866053993 2.482839029
Mg 0.900685640 -0.001036640 1.400700535
O -0.588211431 2.609199568 11.948912996
Mg -0.608790534 4.330675667 11.049090337
O -2.102053032 3.468763827 9.658407335
Mg -0.601471879 2.597484232 8.639662025
O -0.599990713 4.336028139 7.273003964
Mg -2.103605535 3.467927197 6.242281012
O -0.601198845 2.600286867 4.879337895
```



Mg -0.601972023 4.334971416 3.840879515  
O -2.103772956 3.468037542 2.482949010  
Mg -0.601724244 2.600569418 1.401379654  
O -2.089268873 5.209219252 11.948927699  
Mg -2.102456725 6.936135927 11.041971904  
O -3.605778345 6.087850279 9.666628657  
Mg -2.106416284 5.204122647 8.639635796  
O -2.104092642 6.937129714 7.274512504  
Mg -3.605840968 6.068513075 6.234982403  
O -2.103901687 5.202983222 4.879346918  
Mg -2.103824090 6.937192124 3.839661161  
O -3.605831447 6.069999263 2.482897266  
Mg -2.103932100 5.202468252 1.401283228  
O 3.905790081 -0.016841953 11.949045176  
Mg 3.899824273 1.730575527 11.083674202  
O 2.387172257 0.857112184 9.666202120  
Mg 3.902134653 0.000237977 8.639607960  
O 3.902563551 1.732017406 7.276564990  
Mg 2.403860539 0.866653102 6.234990710  
O 3.904415600 -0.001108307 4.879318297  
Mg 3.905564340 1.733729268 3.841682339  
O 2.402633591 0.866016243 2.482679057  
Mg 3.904942644 -0.000874117 1.401282473  
O 2.389445687 2.609405279 11.949170524  
Mg 2.410398263 4.330637868 11.049163320  
O 0.900722230 3.480570643 9.664054734  
Mg 2.402626359 2.597493185 8.639584877  
O 2.401241915 4.336021443 7.272937959  
Mg 0.900645114 3.466803430 6.236370893  
O 2.402565005 2.600310641 4.879229589  
Mg 2.403152300 4.334921923 3.841042017  
O 0.900575998 3.467791449 2.481992736  
Mg 2.402887014 2.600528539 1.401462120  
O 0.900861832 5.202403688 11.969546382  
H 0.900994985 5.201920292 12.939162341  
Mg 0.900375194 6.945690171 11.049197612  
O -0.590403668 6.063313417 9.664282017  
Mg 0.900614207 5.202435124 8.618825565  
O 0.900563351 6.935152115 7.273145597  
Mg -0.602615264 6.070398783 6.236328849  
O 0.900678524 5.202536590 4.877543084  
Mg 0.900657433 6.937513424 3.840997906  
O -0.601822231 6.069872546 2.482139828  
Mg 0.900544347 5.202506782 1.401750991  
O 6.908044915 -0.016562765 11.948884427  
Mg 6.913796757 1.730968058 11.083856961  
O 5.407024525 0.864272168 9.658375372  
Mg 6.912110477 0.000348194 8.639582221  
O 6.911646023 1.732075637 7.276712918  
Mg 5.407186129 0.866056284 6.242217327  
O 6.909743831 -0.001214321 4.879382196

|    |             |              |              |
|----|-------------|--------------|--------------|
| Mg | 6.908623725 | 1.733688181  | 3.841484073  |
| O  | 5.407177691 | 0.866222255  | 2.482968783  |
| Mg | 6.909404059 | -0.000858267 | 1.401147519  |
| O  | 5.406604549 | 2.600914346  | 11.975275348 |
| Mg | 5.407091756 | 4.340938117  | 11.083749045 |
| O  | 3.903202438 | 3.468752299  | 9.658241498  |
| Mg | 5.407072977 | 2.600715340  | 8.646145202  |
| O  | 5.407063821 | 4.337970539  | 7.276590058  |
| Mg | 3.904997232 | 3.468039922  | 6.242349255  |
| O  | 5.407133154 | 2.600646603  | 4.881561095  |
| Mg | 5.407098589 | 4.334371382  | 3.841481256  |
| O  | 3.905035368 | 3.467972797  | 2.482879070  |
| Mg | 5.407133986 | 2.600668107  | 1.401339526  |
| O  | 3.890695446 | 5.209573320  | 11.948942062 |
| Mg | 3.903486497 | 6.936459026  | 11.042138766 |
| O  | 2.391696087 | 6.063297195  | 9.664415085  |
| Mg | 3.907596416 | 5.204203622  | 8.639521557  |
| O  | 3.905214270 | 6.937164754  | 7.274598420  |
| Mg | 2.403818545 | 6.070423860  | 6.236321488  |
| O  | 3.905189151 | 5.202901579  | 4.879304318  |
| Mg | 3.905246755 | 6.937103570  | 3.839626824  |
| O  | 2.402998244 | 6.069844677  | 2.482234003  |
| Mg | 3.905141427 | 5.202443741  | 1.401227436  |

**Optimized structure – 55% (111)/O—H surface**

CELL\_PARAMETERS {alat=9.103}

1.000000000000d0 0.000000000000d0 0.000000000000d0  
-0.500001664841d0 0.866026923807d0 0.000000000000d0  
0.000000000000d0 0.000000000000d0 2.8857243334382d0

|    |              |              |              |
|----|--------------|--------------|--------------|
| O  | 0.880421353  | -0.014972979 | 11.968658826 |
| H  | 0.945660256  | 0.061517219  | 12.930162175 |
| Mg | 0.905870932  | 1.754494688  | 11.064392403 |
| O  | -0.605685400 | 0.849813252  | 9.675178038  |
| Mg | 0.892508454  | -0.000385236 | 8.626629296  |
| O  | 0.897593797  | 1.734279405  | 7.279441349  |
| Mg | -0.601602673 | 0.867524289  | 6.232033420  |
| O  | 0.900155577  | -0.000658780 | 4.882038674  |
| Mg | 0.901253009  | 1.734002430  | 3.838697506  |
| O  | -0.601601446 | 0.866109410  | 2.486413863  |
| Mg | 0.900707310  | -0.000194513 | 1.399489270  |
| O  | -0.585040025 | 2.624233761  | 11.941782112 |
| Mg | -0.592211530 | 4.325310768  | 11.029788654 |
| O  | -2.113274876 | 3.473967292  | 9.675083220  |
| Mg | -0.596879463 | 2.598608838  | 8.639589694  |
| O  | -0.602909507 | 4.336687715  | 7.277001665  |
| Mg | -2.102220765 | 3.466893175  | 6.232666341  |
| O  | -0.601705816 | 2.600644886  | 4.881589501  |
| Mg | -0.600894423 | 4.335194303  | 3.837764138  |

|    |              |              |              |
|----|--------------|--------------|--------------|
| O  | -2.103798357 | 3.467392514  | 2.485347207  |
| Mg | -0.600798420 | 2.600444561  | 1.400018767  |
| O  | -2.103620011 | 5.202446434  | 11.955831613 |
| H  | -2.103069461 | 5.202131432  | 12.921325508 |
| Mg | -2.099714134 | 6.950099520  | 11.030133040 |
| O  | -3.595968162 | 6.075027978  | 9.675098471  |
| Mg | -2.103787904 | 5.202495993  | 8.620357156  |
| O  | -2.104335189 | 6.935275544  | 7.276931050  |
| Mg | -3.607584500 | 6.068999794  | 6.232706454  |
| O  | -2.103751939 | 5.202559054  | 4.879886712  |
| Mg | -2.104039944 | 6.937831516  | 3.837751418  |
| O  | -3.606442433 | 6.070247291  | 2.485434038  |
| Mg | -2.103974643 | 5.202633937  | 1.400763699  |
| O  | 3.876352351  | 0.001357631  | 11.941903898 |
| Mg | 3.884097525  | 1.727420622  | 11.064358394 |
| O  | 2.382218176  | 0.862293970  | 9.662695538  |
| Mg | 3.904400126  | 0.003935547  | 8.639689695  |
| O  | 3.905900583  | 1.730283894  | 7.279464973  |
| Mg | 2.402304711  | 0.866605522  | 6.237995873  |
| O  | 3.905245563  | -0.001270418 | 4.881630682  |
| Mg | 3.904344709  | 1.733668135  | 3.838703139  |
| O  | 2.402794993  | 0.866612872  | 2.487905401  |
| Mg | 3.904861003  | -0.000241410 | 1.399914719  |
| O  | 2.402714339  | 2.600589906  | 12.019552421 |
| Mg | 2.418351419  | 4.320059161  | 11.064405352 |
| O  | 0.907556413  | 3.487652656  | 9.662690047  |
| Mg | 2.402730506  | 2.600653388  | 8.640032660  |
| O  | 2.404966463  | 4.337471427  | 7.279539051  |
| Mg | 0.901170440  | 3.468289473  | 6.237906628  |
| O  | 2.402859604  | 2.600698210  | 4.885324475  |
| Mg | 2.402976337  | 4.334449981  | 3.838676057  |
| O  | 0.901096555  | 3.467768633  | 2.487798904  |
| Mg | 2.402841869  | 2.600632205  | 1.399997985  |
| O  | 0.898635347  | 5.226897156  | 11.968284033 |
| H  | 0.932449238  | 5.132157342  | 12.930095688 |
| Mg | 0.874297226  | 6.970825167  | 11.039353214 |
| O  | -0.602069425 | 6.058460484  | 9.675103971  |
| Mg | 0.905231575  | 5.209153248  | 8.626593681  |
| O  | 0.900518443  | 6.937415522  | 7.276596038  |
| Mg | -0.601464096 | 6.071625449  | 6.232652365  |
| O  | 0.901135418  | 5.202691516  | 4.882038286  |
| Mg | 0.900895005  | 6.936977504  | 3.836064739  |
| O  | -0.601044713 | 6.070008526  | 2.485346732  |
| Mg | 0.901211456  | 5.202027159  | 1.399864809  |
| O  | 6.909126427  | -0.001113324 | 11.970676262 |
| H  | 6.908460019  | -0.000529988 | 12.936360997 |
| Mg | 6.951609843  | 1.739250341  | 11.039445900 |
| O  | 5.423347366  | 0.870562879  | 9.675151976  |
| Mg | 6.909285946  | -0.001218486 | 8.623741653  |
| O  | 6.909742269  | 1.733191339  | 7.276584405  |
| Mg | 5.406115964  | 0.865295688  | 6.232056472  |

|    |             |              |              |
|----|-------------|--------------|--------------|
| O  | 6.909359582 | -0.001191063 | 4.880607574  |
| Mg | 6.909238963 | 1.733190336  | 3.836124327  |
| O  | 5.407450384 | 0.865926784  | 2.486401759  |
| Mg | 6.909400032 | -0.001244609 | 1.398544460  |
| O  | 5.429262368 | 2.590164466  | 11.968404686 |
| H  | 5.330006935 | 2.608636433  | 12.930115256 |
| Mg | 5.393868778 | 4.332143426  | 11.029997852 |
| O  | 3.918487659 | 3.451965231  | 9.662711224  |
| Mg | 5.410510467 | 2.593137764  | 8.626662976  |
| O  | 5.408936925 | 4.335643951  | 7.277011041  |
| Mg | 3.904878934 | 3.467238452  | 6.237974205  |
| O  | 5.407179833 | 2.600029770  | 4.882021929  |
| Mg | 5.406625081 | 4.334579530  | 3.837791936  |
| O  | 3.904668072 | 3.467458602  | 2.487873678  |
| Mg | 5.406346485 | 2.600191293  | 1.399688278  |
| O  | 3.917010953 | 5.176452507  | 11.941754443 |
| Mg | 3.888652680 | 6.897444025  | 11.039690455 |
| O  | 2.390689304 | 6.081463695  | 9.675169442  |
| Mg | 3.900685697 | 5.199373987  | 8.639829093  |
| O  | 3.904496777 | 6.936804585  | 7.276579310  |
| Mg | 2.403962831 | 6.069167208  | 6.231995746  |
| O  | 3.904923020 | 5.202692735  | 4.881678280  |
| Mg | 3.904958384 | 6.937169506  | 3.836090559  |
| O  | 2.402748140 | 6.069825414  | 2.486378421  |
| Mg | 3.904204630 | 5.201819951  | 1.399895911  |

**Structure – (111)/O—CH<sub>4</sub><sup>Str1</sup>**

CELL\_PARAMETERS {alat=9.013}

|                   |                  |                  |
|-------------------|------------------|------------------|
| 1.000000000000d0  | 0.000000000000d0 | 0.000000000000d0 |
| -0.500001664841d0 | 0.866026923807d0 | 0.000000000000d0 |
| 0.000000000000d0  | 0.000000000000d0 | 2.885724333438d0 |

**Starting geometry of (111)/O—CH<sub>4</sub><sup>Str1</sup>**

|    |           |           |           |
|----|-----------|-----------|-----------|
| C  | 2.402661  | 4.334890  | 14.098442 |
| O  | 2.402623  | 2.600927  | 11.948442 |
| Mg | 0.900833  | 1.733811  | 11.067295 |
| O  | -0.600949 | 2.600743  | 11.948254 |
| Mg | -0.600749 | 4.334741  | 11.067273 |
| O  | -2.102599 | 5.201698  | 11.948220 |
| Mg | -2.102763 | 6.936039  | 11.067397 |
| Mg | 3.904355  | 1.733861  | 11.067329 |
| O  | 5.405960  | 2.600948  | 11.948345 |
| Mg | 6.908054  | 1.734057  | 11.067516 |
| O  | 6.907882  | -0.000157 | 11.948146 |
| Mg | 2.402661  | 4.334890  | 11.067307 |
| O  | 3.904302  | 5.201909  | 11.948299 |
| Mg | 3.904318  | 6.936320  | 11.067619 |
| O  | 3.904553  | -0.000181 | 11.948245 |
| O  | 0.900976  | 5.201881  | 11.948392 |
| Mg | 0.900733  | 6.936092  | 11.067464 |
| O  | 0.900970  | -0.000361 | 11.948064 |
| Mg | 5.406317  | 4.335066  | 11.067464 |

|    |           |           |          |       |
|----|-----------|-----------|----------|-------|
| O  | -0.600683 | 6.069137  | 9.659880 |       |
| Mg | 0.900977  | 5.201977  | 8.639892 |       |
| O  | 2.402688  | 6.069170  | 9.659902 |       |
| Mg | 3.904547  | 5.202125  | 8.639882 |       |
| O  | 3.904367  | 3.467922  | 9.659877 |       |
| Mg | 5.406229  | 2.601087  | 8.639927 |       |
| O  | 5.406046  | 0.866878  | 9.659818 |       |
| Mg | 6.907938  | -0.000258 | 8.639991 |       |
| Mg | -2.102495 | 5.201910  | 8.639977 |       |
| O  | -3.604308 | 6.069015  | 9.659852 |       |
| O  | -2.102622 | 3.467763  | 9.659833 |       |
| Mg | -0.600823 | 2.600874  | 8.640045 |       |
| O  | 0.900989  | 3.467889  | 9.659861 |       |
| Mg | 2.402631  | 2.600953  | 8.639933 |       |
| O  | 2.402668  | 0.866848  | 9.659798 |       |
| Mg | 3.904349  | -0.000395 | 8.639979 |       |
| O  | -0.600953 | 0.866728  | 9.659776 |       |
| Mg | 0.900869  | -0.000457 | 8.640083 |       |
| O  | 5.406271  | 4.334824  | 7.275807 |       |
| Mg | 3.904401  | 3.467957  | 6.240769 |       |
| O  | 2.402597  | 4.334832  | 7.275908 |       |
| Mg | 2.402722  | 6.069085  | 6.240884 |       |
| O  | 3.904556  | 6.936138  | 7.275754 |       |
| O  | 3.904268  | 1.733842  | 7.275938 |       |
| Mg | 2.402680  | 0.866633  | 6.240702 |       |
| O  | 0.900915  | 1.733828  | 7.275934 |       |
| Mg | -0.600997 | 0.866634  | 6.240831 |       |
| Mg | 5.406083  | 0.866672  | 6.240740 |       |
| O  | 6.907941  | 1.733834  | 7.275840 |       |
| Mg | 0.901003  | 3.467913  | 6.240733 |       |
| O  | -0.600755 | 4.334818  | 7.275903 |       |
| Mg | -2.102673 | 3.467913  | 6.240858 |       |
| O  | 0.900884  | 6.936144  | 7.275854 |       |
| Mg | -0.600675 | 6.069043  | 6.240844 |       |
| O  | -2.102469 | 6.936130  | 7.275848 |       |
| Mg | -3.604356 | 6.069045  | 6.240973 |       |
| O  | 2.402623  | 2.600975  | 4.879260 | 0 0 0 |
| Mg | 0.900878  | 1.733758  | 3.841750 | 0 0 0 |
| O  | -0.600924 | 2.600863  | 4.879265 | 0 0 0 |
| Mg | -0.600791 | 4.334803  | 3.841724 | 0 0 0 |
| O  | -2.102595 | 5.201843  | 4.879235 | 0 0 0 |
| Mg | -2.102631 | 6.936104  | 3.841859 | 0 0 0 |
| Mg | 3.904276  | 1.733799  | 3.841785 | 0 0 0 |
| O  | 5.406035  | 2.601007  | 4.879159 | 0 0 0 |
| Mg | 6.907937  | 1.733940  | 3.841856 | 0 0 0 |
| O  | 6.907882  | -0.000250 | 4.879037 | 0 0 0 |
| Mg | 2.402608  | 4.334844  | 3.841761 | 0 0 0 |
| O  | 3.904364  | 5.201988  | 4.879131 | 0 0 0 |
| Mg | 3.904427  | 6.936284  | 3.841965 | 0 0 0 |
| O  | 3.904470  | -0.000282 | 4.879136 | 0 0 0 |
| O  | 0.900954  | 5.201956  | 4.879230 | 0 0 0 |
| Mg | 0.900768  | 6.936143  | 3.841896 | 0 0 0 |
| O  | 0.900922  | -0.000394 | 4.879140 | 0 0 0 |
| Mg | 5.406267  | 4.334985  | 3.841828 | 0 0 0 |
| O  | 0.900998  | 3.467942  | 2.480698 | 0 0 0 |
| Mg | -0.600804 | 2.600880  | 1.401124 | 0 0 0 |
| O  | -2.102631 | 3.467797  | 2.480596 | 0 0 0 |
| Mg | -2.102476 | 5.201910  | 1.401120 | 0 0 0 |
| O  | -3.604312 | 6.068961  | 2.480542 | 0 0 0 |
| Mg | 2.402597  | 2.600928  | 1.401025 | 0 0 0 |

|    |           |           |           |       |
|----|-----------|-----------|-----------|-------|
| O  | 3.904352  | 3.467957  | 2.480721  | 0 0 0 |
| Mg | 5.406136  | 2.601028  | 1.401090  | 0 0 0 |
| O  | 5.406038  | 0.866913  | 2.480654  | 0 0 0 |
| Mg | 6.907841  | -0.000119 | 1.401206  | 0 0 0 |
| Mg | 0.900926  | 5.201959  | 1.401021  | 0 0 0 |
| O  | 2.402671  | 6.069120  | 2.480668  | 0 0 0 |
| Mg | 3.904465  | 5.202059  | 1.401086  | 0 0 0 |
| O  | 2.402683  | 0.866897  | 2.480632  | 0 0 0 |
| Mg | 0.900902  | -0.000266 | 1.401241  | 0 0 0 |
| O  | -0.600945 | 0.866753  | 2.480529  | 0 0 0 |
| Mg | 3.904302  | -0.000220 | 1.401142  | 0 0 0 |
| O  | -0.600683 | 6.069104  | 2.480645  | 0 0 0 |
| H  | 2.402651  | 3.896577  | 15.095339 |       |
| H  | 2.402685  | 5.420877  | 14.179389 |       |
| H  | 3.291819  | 4.011033  | 13.559520 |       |
| H  | 1.513489  | 4.011072  | 13.559520 |       |

#### Final geometry of (111)/O—CH<sub>4</sub><sup>Str1</sup>

|    |              |              |              |  |
|----|--------------|--------------|--------------|--|
| C  | 2.407354620  | 6.060103304  | 12.564627154 |  |
| O  | 2.401872176  | 2.612119076  | 11.950754727 |  |
| Mg | 0.891188151  | 1.721424495  | 11.048714724 |  |
| O  | -0.560471668 | 2.565342562  | 11.960350586 |  |
| Mg | -0.587501236 | 4.339183797  | 11.250036034 |  |
| O  | -2.110890392 | 5.248982161  | 11.965369846 |  |
| Mg | -2.102630301 | 6.917719606  | 11.032860665 |  |
| Mg | 3.911935941  | 1.726191929  | 11.045419403 |  |
| O  | 5.361695450  | 2.562700123  | 11.968712090 |  |
| Mg | 6.905546281  | 1.630951326  | 11.348352009 |  |
| O  | 6.913695404  | -0.403393458 | 12.064173296 |  |
| Mg | 2.396356920  | 4.276060566  | 10.872440797 |  |
| O  | 3.567180587  | 5.390362213  | 12.067946234 |  |
| Mg | 3.947137636  | 6.943698502  | 10.859157539 |  |
| O  | 3.927496912  | -0.027369600 | 11.947110918 |  |
| O  | 1.249808288  | 5.393966858  | 12.078334697 |  |
| Mg | 0.857281755  | 6.941471307  | 10.869431842 |  |
| O  | 0.877153598  | -0.031817295 | 11.945412480 |  |
| Mg | 5.350023336  | 4.352725546  | 11.303571643 |  |
| O  | -0.575129397 | 6.077101529  | 9.677301135  |  |
| Mg | 0.882566569  | 5.181080581  | 8.585018101  |  |
| O  | 2.401377511  | 6.056381825  | 9.572484786  |  |
| Mg | 3.920849541  | 5.177797817  | 8.586152815  |  |
| O  | 3.871995335  | 3.469063587  | 9.681187780  |  |
| Mg | 5.429113139  | 2.600127902  | 8.726192170  |  |
| O  | 5.403763568  | 0.819676627  | 9.683795557  |  |
| Mg | 6.909371490  | 0.009214474  | 8.592242392  |  |
| Mg | -2.105288383 | 5.182339412  | 8.698962402  |  |
| O  | -3.633959470 | 6.079413652  | 9.670308663  |  |
| O  | -2.094085880 | 3.475083307  | 9.685899127  |  |
| Mg | -0.616960476 | 2.594746386  | 8.716574542  |  |
| O  | 0.928401657  | 3.471591967  | 9.678186735  |  |
| Mg | 2.402159080  | 2.572677332  | 8.596066502  |  |
| O  | 2.403125988  | 0.855092059  | 9.697948560  |  |
| Mg | 3.892848228  | 0.000080022  | 8.593766063  |  |
| O  | -0.594198090 | 0.818251823  | 9.680456477  |  |
| Mg | 0.915838069  | -0.001098881 | 8.592650847  |  |
| O  | 5.400012536  | 4.331927977  | 7.283985111  |  |
| Mg | 3.911657725  | 3.454100644  | 6.232556772  |  |
| O  | 2.402092772  | 4.315170270  | 7.255793177  |  |

|    |              |              |              |   |   |   |
|----|--------------|--------------|--------------|---|---|---|
| Mg | 2.401048003  | 6.063753118  | 6.227248811  |   |   |   |
| O  | 3.912069063  | 6.935543415  | 7.254966725  |   |   |   |
| O  | 3.897265177  | 1.720431762  | 7.285913663  |   |   |   |
| Mg | 2.402906909  | 0.860479045  | 6.215375751  |   |   |   |
| O  | 0.907840187  | 1.722128168  | 7.287023660  |   |   |   |
| Mg | -0.600389291 | 0.869401367  | 6.234332947  |   |   |   |
| Mg | 5.406810742  | 0.870789394  | 6.234573739  |   |   |   |
| O  | 6.909487868  | 1.721158834  | 7.291019674  |   |   |   |
| Mg | 0.891266602  | 3.456098694  | 6.232804196  |   |   |   |
| O  | -0.596731515 | 4.334676412  | 7.283678167  |   |   |   |
| Mg | -2.104423753 | 3.462127079  | 6.265607610  |   |   |   |
| O  | 0.889526356  | 6.937163186  | 7.256756571  |   |   |   |
| Mg | -0.610220581 | 6.062436844  | 6.229192599  |   |   |   |
| O  | -2.103509687 | 6.939150801  | 7.282787618  |   |   |   |
| Mg | -3.599022514 | 6.060941531  | 6.229830120  |   |   |   |
| O  | 2.402623000  | 2.600975000  | 4.879260000  | 0 | 0 | 0 |
| Mg | 0.900878000  | 1.733758000  | 3.841750000  | 0 | 0 | 0 |
| O  | -0.600924000 | 2.600863000  | 4.879265000  | 0 | 0 | 0 |
| Mg | -0.600791000 | 4.334803000  | 3.841724000  | 0 | 0 | 0 |
| O  | -2.102595000 | 5.201843000  | 4.879235000  | 0 | 0 | 0 |
| Mg | -2.102631000 | 6.936104000  | 3.841859000  | 0 | 0 | 0 |
| Mg | 3.904276000  | 1.733799000  | 3.841785000  | 0 | 0 | 0 |
| O  | 5.406035000  | 2.601007000  | 4.879159000  | 0 | 0 | 0 |
| Mg | 6.907937000  | 1.733940000  | 3.841856000  | 0 | 0 | 0 |
| O  | 6.907882000  | -0.000250000 | 4.879037000  | 0 | 0 | 0 |
| Mg | 2.402608000  | 4.334844000  | 3.841761000  | 0 | 0 | 0 |
| O  | 3.904364000  | 5.201988000  | 4.879131000  | 0 | 0 | 0 |
| Mg | 3.904427000  | 6.936284000  | 3.841965000  | 0 | 0 | 0 |
| O  | 3.904470000  | -0.000282000 | 4.879136000  | 0 | 0 | 0 |
| O  | 0.900954000  | 5.201956000  | 4.879230000  | 0 | 0 | 0 |
| Mg | 0.900768000  | 6.936143000  | 3.841896000  | 0 | 0 | 0 |
| O  | 0.900922000  | -0.000394000 | 4.879140000  | 0 | 0 | 0 |
| Mg | 5.406267000  | 4.334985000  | 3.841828000  | 0 | 0 | 0 |
| O  | 0.900998000  | 3.467942000  | 2.480698000  | 0 | 0 | 0 |
| Mg | -0.600804000 | 2.600880000  | 1.401124000  | 0 | 0 | 0 |
| O  | -2.102631000 | 3.467797000  | 2.480596000  | 0 | 0 | 0 |
| Mg | -2.102476000 | 5.201910000  | 1.401120000  | 0 | 0 | 0 |
| O  | -3.604312000 | 6.068961000  | 2.480542000  | 0 | 0 | 0 |
| Mg | 2.402597000  | 2.600928000  | 1.401025000  | 0 | 0 | 0 |
| O  | 3.904352000  | 3.467957000  | 2.480721000  | 0 | 0 | 0 |
| Mg | 5.406136000  | 2.601028000  | 1.401090000  | 0 | 0 | 0 |
| O  | 5.406038000  | 0.866913000  | 2.480654000  | 0 | 0 | 0 |
| Mg | 6.907841000  | -0.000119000 | 1.401206000  | 0 | 0 | 0 |
| Mg | 0.900926000  | 5.201959000  | 1.401021000  | 0 | 0 | 0 |
| O  | 2.402671000  | 6.069120000  | 2.480668000  | 0 | 0 | 0 |
| Mg | 3.904465000  | 5.202059000  | 1.401086000  | 0 | 0 | 0 |
| O  | 2.402683000  | 0.866897000  | 2.480632000  | 0 | 0 | 0 |
| Mg | 0.900902000  | -0.000266000 | 1.401241000  | 0 | 0 | 0 |
| O  | -0.600945000 | 0.866753000  | 2.480529000  | 0 | 0 | 0 |
| Mg | 3.904302000  | -0.000220000 | 1.401142000  | 0 | 0 | 0 |
| O  | -0.600683000 | 6.069104000  | 2.480645000  | 0 | 0 | 0 |
| H  | 2.389157039  | 2.748594010  | 12.907332318 |   |   |   |
| H  | 2.414782589  | 6.070832393  | 13.670879974 |   |   |   |
| H  | 5.277739192  | 7.651581319  | 12.898553731 |   |   |   |
| H  | -0.466967786 | 7.695756940  | 12.903329741 |   |   |   |

**Structure – (111)/O—CH<sub>4</sub><sup>Str2</sup>**

CELL\_PARAMETERS {alat=9.013}

|                   |                  |                  |
|-------------------|------------------|------------------|
| 1.000000000000d0  | 0.000000000000d0 | 0.000000000000d0 |
| -0.500001664841d0 | 0.866026923807d0 | 0.000000000000d0 |
| 0.000000000000d0  | 0.000000000000d0 | 2.885724333438d0 |

**Starting geometry of (111)/O—CH<sub>4</sub><sup>Str2</sup>**

|    |           |           |           |
|----|-----------|-----------|-----------|
| O  | 2.402623  | 2.600927  | 11.948442 |
| Mg | 3.904355  | 1.733861  | 11.067329 |
| O  | 3.904553  | -0.000181 | 11.948245 |
| Mg | 2.402661  | 4.334890  | 11.067307 |
| O  | 0.900976  | 5.201881  | 11.948392 |
| Mg | 0.900733  | 6.936092  | 11.067464 |
| Mg | 0.900833  | 1.733811  | 11.067295 |
| O  | 0.900970  | -0.000361 | 11.948064 |
| O  | 3.904302  | 5.201909  | 11.948299 |
| Mg | 5.406317  | 4.335066  | 11.067464 |
| O  | 5.405960  | 2.600948  | 11.948345 |
| Mg | 6.908054  | 1.734057  | 11.067516 |
| O  | 6.907882  | -0.000157 | 11.948146 |
| Mg | 3.904318  | 6.936320  | 11.067619 |
| O  | -0.600949 | 2.600743  | 11.948254 |
| Mg | -0.600749 | 4.334741  | 11.067273 |
| O  | -2.102599 | 5.201698  | 11.948220 |
| Mg | -2.102763 | 6.936039  | 11.067397 |
| O  | -0.600683 | 6.069137  | 9.659879  |
| Mg | -2.102495 | 5.201909  | 8.639976  |
| O  | -2.102622 | 3.467762  | 9.659832  |
| Mg | -0.600823 | 2.600874  | 8.640045  |
| O  | -0.600952 | 0.866728  | 9.659776  |
| Mg | 0.900870  | -0.000457 | 8.640083  |
| O  | 2.402668  | 0.866848  | 9.659798  |
| Mg | 3.904350  | -0.000395 | 8.639980  |
| O  | 5.406046  | 0.866878  | 9.659819  |
| Mg | 6.907939  | -0.000258 | 8.639992  |
| Mg | 0.900977  | 5.201977  | 8.639892  |
| O  | 0.900989  | 3.467889  | 9.659861  |
| Mg | 2.402631  | 2.600953  | 8.639933  |
| O  | 3.904367  | 3.467922  | 9.659877  |
| Mg | 5.406229  | 2.601087  | 8.639928  |
| O  | 2.402688  | 6.069170  | 9.659902  |
| Mg | 3.904547  | 5.202125  | 8.639882  |
| O  | -3.604308 | 6.069014  | 9.659851  |
| O  | 5.406271  | 4.334824  | 7.275808  |
| Mg | 3.904402  | 3.467956  | 6.240769  |
| O  | 3.904269  | 1.733841  | 7.275939  |
| Mg | 5.406084  | 0.866672  | 6.240741  |
| O  | 6.907942  | 1.733834  | 7.275841  |
| O  | 2.402598  | 4.334831  | 7.275908  |
| Mg | 0.901004  | 3.467912  | 6.240733  |
| O  | 0.900916  | 1.733827  | 7.275934  |
| Mg | -0.600996 | 0.866632  | 6.240831  |
| Mg | 2.402722  | 6.069084  | 6.240884  |
| O  | 0.900884  | 6.936143  | 7.275853  |
| Mg | -0.600675 | 6.069041  | 6.240842  |
| O  | -2.102469 | 6.936128  | 7.275846  |
| Mg | -3.604356 | 6.069042  | 6.240970  |



|    |           |           |           |       |  |
|----|-----------|-----------|-----------|-------|--|
| O  | 3.904556  | 6.936137  | 7.275754  |       |  |
| O  | -0.600754 | 4.334816  | 7.275902  |       |  |
| Mg | -2.102672 | 3.467911  | 6.240857  |       |  |
| Mg | 2.402681  | 0.866632  | 6.240702  |       |  |
| O  | 2.402624  | 2.600974  | 4.879260  | 0 0 0 |  |
| Mg | 3.904278  | 1.733798  | 3.841785  | 0 0 0 |  |
| O  | 3.904472  | -0.000283 | 4.879136  | 0 0 0 |  |
| Mg | 2.402609  | 4.334843  | 3.841761  | 0 0 0 |  |
| O  | 0.900955  | 5.201954  | 4.879230  | 0 0 0 |  |
| Mg | 0.900769  | 6.936141  | 3.841896  | 0 0 0 |  |
| Mg | 0.900880  | 1.733757  | 3.841750  | 0 0 0 |  |
| O  | 0.900924  | -0.000396 | 4.879140  | 0 0 0 |  |
| O  | 3.904365  | 5.201987  | 4.879131  | 0 0 0 |  |
| Mg | 5.406268  | 4.334984  | 3.841829  | 0 0 0 |  |
| O  | 5.406036  | 2.601006  | 4.879160  | 0 0 0 |  |
| Mg | 6.907938  | 1.733939  | 3.841857  | 0 0 0 |  |
| O  | 6.907883  | -0.000251 | 4.879038  | 0 0 0 |  |
| Mg | 3.904428  | 6.936283  | 3.841965  | 0 0 0 |  |
| O  | -0.600923 | 2.600861  | 4.879264  | 0 0 0 |  |
| Mg | -0.600790 | 4.334802  | 3.841723  | 0 0 0 |  |
| O  | -2.102594 | 5.201841  | 4.879234  | 0 0 0 |  |
| Mg | -2.102630 | 6.936102  | 3.841858  | 0 0 0 |  |
| O  | 0.901000  | 3.467940  | 2.480698  | 0 0 0 |  |
| Mg | 2.402599  | 2.600926  | 1.401025  | 0 0 0 |  |
| O  | 2.402685  | 0.866895  | 2.480632  | 0 0 0 |  |
| Mg | 3.904304  | -0.000222 | 1.401143  | 0 0 0 |  |
| O  | 5.406039  | 0.866911  | 2.480655  | 0 0 0 |  |
| Mg | 6.907843  | -0.000121 | 1.401207  | 0 0 0 |  |
| Mg | 0.900928  | 5.201957  | 1.401020  | 0 0 0 |  |
| O  | -0.600681 | 6.069102  | 2.480644  | 0 0 0 |  |
| Mg | -2.102474 | 5.201908  | 1.401119  | 0 0 0 |  |
| O  | -3.604310 | 6.068959  | 2.480540  | 0 0 0 |  |
| Mg | -0.600802 | 2.600878  | 1.401123  | 0 0 0 |  |
| O  | -0.600943 | 0.866751  | 2.480529  | 0 0 0 |  |
| Mg | 0.900904  | -0.000268 | 1.401241  | 0 0 0 |  |
| O  | 2.402673  | 6.069118  | 2.480667  | 0 0 0 |  |
| Mg | 3.904467  | 5.202057  | 1.401086  | 0 0 0 |  |
| O  | 3.904354  | 3.467955  | 2.480721  | 0 0 0 |  |
| Mg | 5.406138  | 2.601026  | 1.401090  | 0 0 0 |  |
| O  | -2.102629 | 3.467795  | 2.480595  | 0 0 0 |  |
| C  | 2.402623  | 2.600927  | 14.098442 |       |  |
| H  | 3.240061  | 3.084454  | 14.599262 |       |  |
| H  | 1.714566  | 2.203651  | 14.843204 |       |  |
| H  | 1.883328  | 3.327828  | 13.475651 |       |  |
| H  | 2.772537  | 1.787775  | 13.475651 |       |  |

#### Final geometry of (111)/O—CH<sub>4</sub><sup>Str2</sup>

|    |             |             |              |  |  |
|----|-------------|-------------|--------------|--|--|
| O  | 2.423224075 | 2.597762138 | 11.945171795 |  |  |
| Mg | 3.997230734 | 1.697139056 | 11.079909756 |  |  |
| O  | 3.686705239 | 0.052792968 | 12.113674843 |  |  |
| Mg | 2.374765307 | 4.412663045 | 11.077330348 |  |  |
| O  | 0.771075452 | 4.855107226 | 12.167784275 |  |  |
| Mg | 0.659841480 | 6.727229310 | 12.386616366 |  |  |
| Mg | 1.032210608 | 1.759094741 | 10.841716891 |  |  |
| O  | 0.433333767 | 0.444578401 | 12.263016664 |  |  |
| O  | 3.885031656 | 5.244459285 | 11.990889139 |  |  |
| Mg | 5.424681660 | 4.335762804 | 11.218201835 |  |  |
| O  | 5.505692670 | 2.553608023 | 12.005310000 |  |  |
| Mg | 6.842406436 | 1.591520756 | 11.013501873 |  |  |

|    |              |              |              |   |   |   |
|----|--------------|--------------|--------------|---|---|---|
| O  | 6.726536593  | -0.133050945 | 11.923671300 |   |   |   |
| Mg | 3.815130959  | 6.937674972  | 11.063743240 |   |   |   |
| O  | -0.346219552 | 1.718706880  | 12.334648217 |   |   |   |
| Mg | -0.615083634 | 4.426200362  | 10.913488119 |   |   |   |
| O  | -2.016144025 | 5.259306202  | 11.999308789 |   |   |   |
| Mg | -2.034679900 | 6.914406352  | 10.953699851 |   |   |   |
| O  | -0.650783371 | 6.037904852  | 9.613470787  |   |   |   |
| Mg | -2.120432016 | 5.201079671  | 8.614437865  |   |   |   |
| O  | -2.036469533 | 3.457078750  | 9.728481867  |   |   |   |
| Mg | -0.607585188 | 2.594106952  | 8.594041348  |   |   |   |
| O  | -0.595675520 | 0.887357400  | 9.701763391  |   |   |   |
| Mg | 0.889460376  | -0.006897150 | 8.595841963  |   |   |   |
| O  | 2.389179043  | 0.858505559  | 9.665422273  |   |   |   |
| Mg | 3.953273007  | -0.007233066 | 8.681795056  |   |   |   |
| O  | 5.408651956  | 0.954899315  | 9.619501166  |   |   |   |
| Mg | 6.876021315  | -0.034470871 | 8.692474061  |   |   |   |
| Mg | 0.918660526  | 5.234534785  | 8.670099751  |   |   |   |
| O  | 0.890839280  | 3.438659705  | 9.682330356  |   |   |   |
| Mg | 2.453989790  | 2.623889273  | 8.601896027  |   |   |   |
| O  | 3.921017668  | 3.465699589  | 9.695777580  |   |   |   |
| Mg | 5.430660141  | 2.642004904  | 8.654786471  |   |   |   |
| O  | 2.471229617  | 6.011653453  | 9.637028703  |   |   |   |
| Mg | 3.951364302  | 5.193293174  | 8.672898404  |   |   |   |
| O  | -3.583177508 | 6.134046520  | 9.736349081  |   |   |   |
| O  | 5.422200477  | 4.344595499  | 7.302343635  |   |   |   |
| Mg | 3.913430545  | 3.471853057  | 6.235928216  |   |   |   |
| O  | 3.898912515  | 1.745772092  | 7.270462530  |   |   |   |
| Mg | 5.412388334  | 0.872553790  | 6.260052404  |   |   |   |
| O  | 6.922908620  | 1.751577798  | 7.271463812  |   |   |   |
| O  | 2.410253938  | 4.322328513  | 7.275732488  |   |   |   |
| Mg | 0.905274182  | 3.469776202  | 6.236918750  |   |   |   |
| O  | 0.900125737  | 1.730825011  | 7.277547322  |   |   |   |
| Mg | -0.607152687 | 0.863613565  | 6.235307856  |   |   |   |
| Mg | 2.411961392  | 6.068301832  | 6.259040050  |   |   |   |
| O  | 0.910608439  | 6.938558172  | 7.289090621  |   |   |   |
| Mg | -0.595207889 | 6.072339918  | 6.251712409  |   |   |   |
| O  | -2.113222251 | 6.936608103  | 7.269161503  |   |   |   |
| Mg | -3.602255800 | 6.073968298  | 6.226194871  |   |   |   |
| O  | 3.922626781  | 6.940081484  | 7.282664765  |   |   |   |
| O  | -0.599718949 | 4.325655243  | 7.270288567  |   |   |   |
| Mg | -2.095576227 | 3.471372188  | 6.223653637  |   |   |   |
| Mg | 2.409249891  | 0.864587696  | 6.239447299  |   |   |   |
| O  | 2.402624000  | 2.600974000  | 4.879260000  | 0 | 0 | 0 |
| Mg | 3.904278000  | 1.733798000  | 3.841785000  | 0 | 0 | 0 |
| O  | 3.904472000  | -0.000283000 | 4.879136000  | 0 | 0 | 0 |
| Mg | 2.402609000  | 4.334843000  | 3.841761000  | 0 | 0 | 0 |
| O  | 0.900955000  | 5.201954000  | 4.879230000  | 0 | 0 | 0 |
| Mg | 0.900769000  | 6.936141000  | 3.841896000  | 0 | 0 | 0 |
| Mg | 0.900880000  | 1.733757000  | 3.841750000  | 0 | 0 | 0 |
| O  | 0.900924000  | -0.000396000 | 4.879140000  | 0 | 0 | 0 |
| O  | 3.904365000  | 5.201987000  | 4.879131000  | 0 | 0 | 0 |
| Mg | 5.406268000  | 4.334984000  | 3.841829000  | 0 | 0 | 0 |
| O  | 5.406036000  | 2.601006000  | 4.879160000  | 0 | 0 | 0 |
| Mg | 6.907938000  | 1.733939000  | 3.841857000  | 0 | 0 | 0 |
| O  | 6.907883000  | -0.000251000 | 4.879038000  | 0 | 0 | 0 |
| Mg | 3.904428000  | 6.936283000  | 3.841965000  | 0 | 0 | 0 |
| O  | -0.600923000 | 2.600861000  | 4.879264000  | 0 | 0 | 0 |
| Mg | -0.600790000 | 4.334802000  | 3.841723000  | 0 | 0 | 0 |
| O  | -2.102594000 | 5.201841000  | 4.879234000  | 0 | 0 | 0 |
| Mg | -2.102630000 | 6.936102000  | 3.841858000  | 0 | 0 | 0 |

|    |              |              |              |   |   |   |
|----|--------------|--------------|--------------|---|---|---|
| O  | 0.901000000  | 3.467940000  | 2.480698000  | 0 | 0 | 0 |
| Mg | 2.402599000  | 2.600926000  | 1.401025000  | 0 | 0 | 0 |
| O  | 2.402685000  | 0.866895000  | 2.480632000  | 0 | 0 | 0 |
| Mg | 3.904304000  | -0.000222000 | 1.401143000  | 0 | 0 | 0 |
| O  | 5.406039000  | 0.866911000  | 2.480655000  | 0 | 0 | 0 |
| Mg | 6.907843000  | -0.000121000 | 1.401207000  | 0 | 0 | 0 |
| Mg | 0.900928000  | 5.201957000  | 1.401020000  | 0 | 0 | 0 |
| O  | -0.600681000 | 6.069102000  | 2.480644000  | 0 | 0 | 0 |
| Mg | -2.102474000 | 5.201908000  | 1.401119000  | 0 | 0 | 0 |
| O  | -3.604310000 | 6.068959000  | 2.480540000  | 0 | 0 | 0 |
| Mg | -0.600802000 | 2.600878000  | 1.401123000  | 0 | 0 | 0 |
| O  | -0.600943000 | 0.866751000  | 2.480529000  | 0 | 0 | 0 |
| Mg | 0.900904000  | -0.000268000 | 1.401241000  | 0 | 0 | 0 |
| O  | 2.402673000  | 6.069118000  | 2.480667000  | 0 | 0 | 0 |
| Mg | 3.904467000  | 5.202057000  | 1.401086000  | 0 | 0 | 0 |
| O  | 3.904354000  | 3.467955000  | 2.480721000  | 0 | 0 | 0 |
| Mg | 5.406138000  | 2.601026000  | 1.401090000  | 0 | 0 | 0 |
| O  | -2.102629000 | 3.467795000  | 2.480595000  | 0 | 0 | 0 |
| C  | 2.430768892  | 2.581231417  | 13.362847453 |   |   |   |
| H  | 3.399112295  | 2.964104070  | 13.733693665 |   |   |   |
| H  | -0.049044601 | 2.100644580  | 13.190280458 |   |   |   |
| H  | 1.633050201  | 3.258952160  | 13.734012659 |   |   |   |
| H  | 2.287321030  | 1.544640414  | 13.720081158 |   |   |   |
